# Supplementary material for: Graphdiyne–metal contacts and graphdiyne transistors
Source: Royal Society of Chemistry journal article supplement (doi:10.1039/c4nr06541g), 2014-12-10
Supplement: c4nr06541g1.pdf [file c4nr06541g1.pdf]

## Graphdiyne-metal contacts and graphdiyne transistors

Yuanyuan Pan<sup>1,†</sup>, Yangyang Wang<sup>1,†</sup>, Lu Wang<sup>4</sup>, Hongxia Zhong<sup>1</sup>, Ruge Quhe<sup>1,3</sup>, Zeyuan Ni<sup>1</sup>,

Meng Ye<sup>1</sup>, Wai-Ning Mei<sup>4</sup>, Junjie Shi<sup>1</sup>, Wanlin Guo<sup>5</sup>, Jinbo Yang<sup>1,2,\*</sup>, Jing Lu<sup>1,2,\*</sup>

<sup>1</sup>State Key Laboratory of Mesoscopic Physics and Department of Physics,

Peking University, Beijing 100871, P. R. China

<sup>2</sup>Collaborative Innovation Center of Quantum Matter, Beijing 100871, P. R. China

<sup>3</sup>Academy for Advanced Interdisciplinary Studies, Peking University, Beijing 100871,

P. R. China

<sup>4</sup>Department of Physics, University of Nebraska at Omaha, Omaha, Nebraska 68182-0266

<sup>5</sup>State Key Laboratory of Mechanics and Control of Mechanical Structures, Key Laboratory for Intelligent Nano Materials and Devices of the Ministry of Education, and Institute of Nanoscience,

Nanjing University of Aeronautics and Astronautics, Nanjing 210016, P. R. China

<sup>†</sup>These authors contributed equally to this work.

\* Corresponding authors: [jinglu@pku.edu.cn](mailto:jinglu@pku.edu.cn), [jbyang@pku.edu.cn](mailto:jbyang@pku.edu.cn)

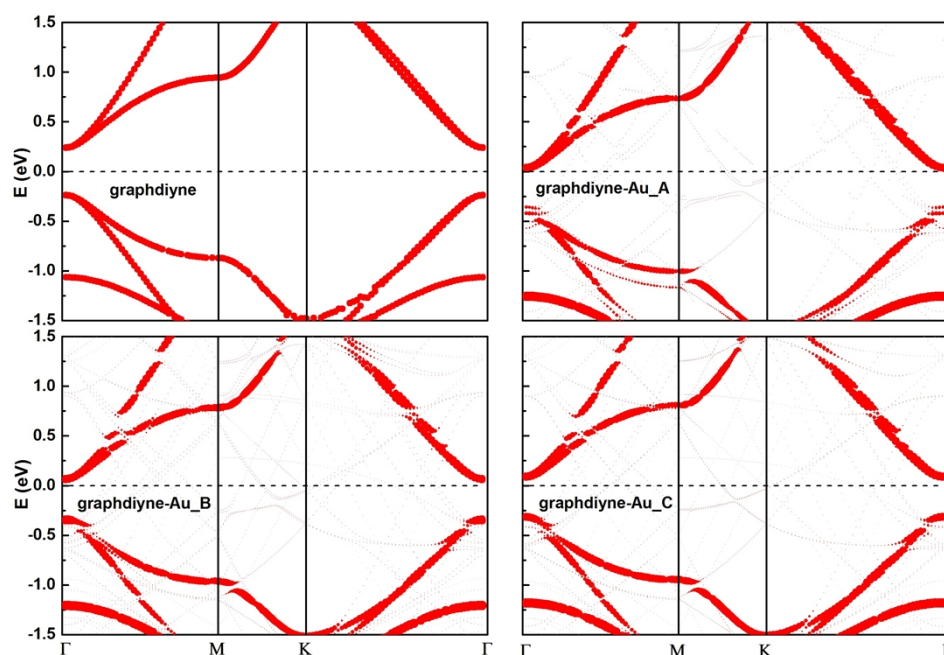

**Fig. S1** Band structure of pure graphdiyne and graphdiyne adsorbed on Au surface of three kind configurations (graphdiyne-Au\_A, B, C present the configuration of the center of the carbon hexagon of graphdiyne on the top of metal atoms of A, B, and C layer, respectively). The Fermi level is set at zero energy. Gray line: the bands of adsorbed systems; red line: the bands of graphdiyne.

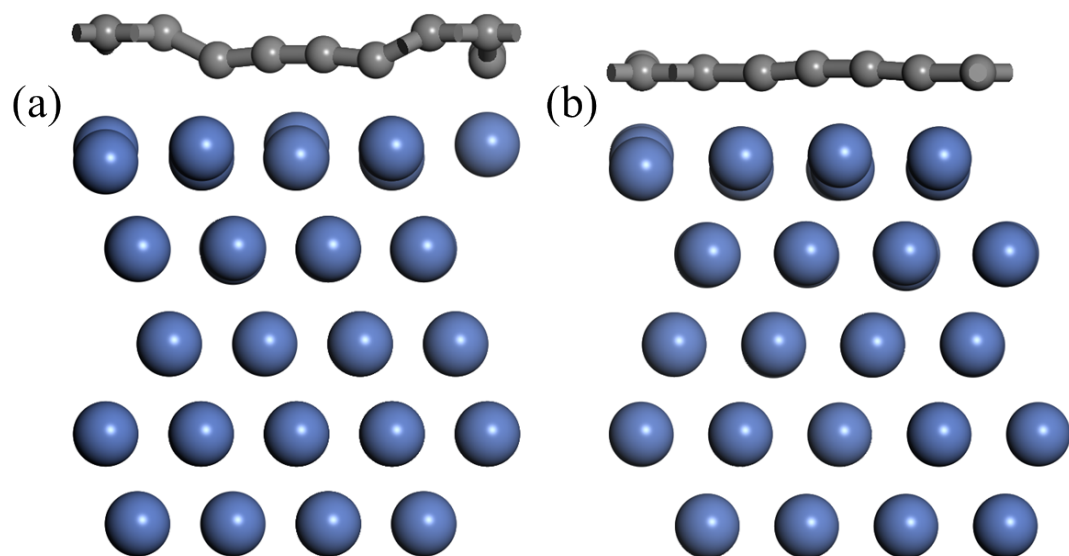

**Fig. S2** Comparison of the optimized structure of the system (a) Ni surface (blue balls) adjusted to graphdiyne (gray balls) and (b) graphdiyne adjusted to Ni surface.

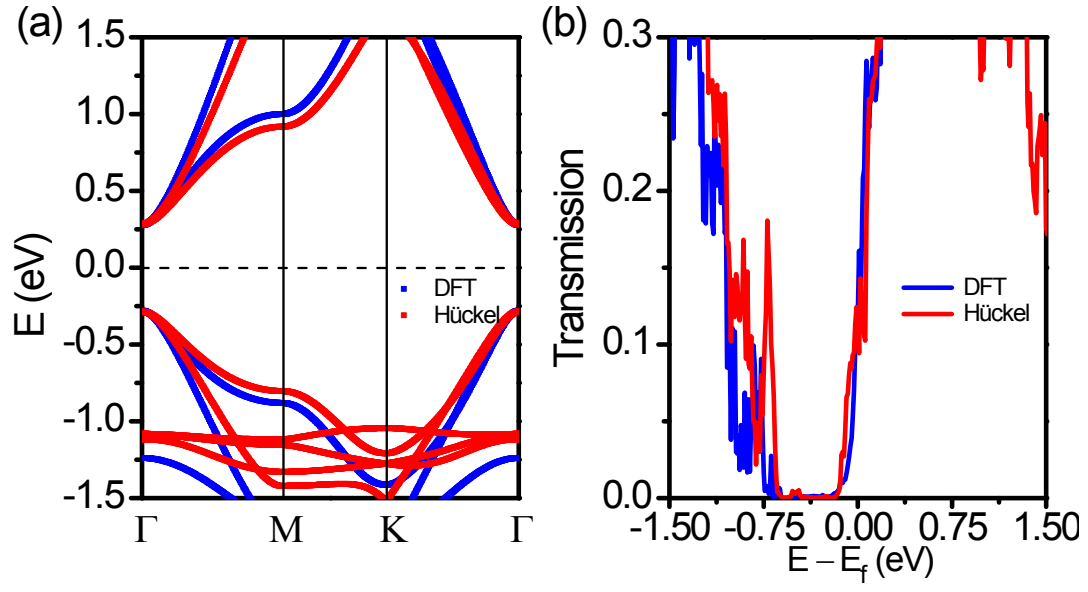

**Fig. S3** Comparison of (a) the band structure of graphdiyne and (b) the transmission spectra of the 6 nm-channel-length graphdiyne FET ( $V_g = 0$  and  $V_{bias} = 0$ ) calculated by DFT (blue) and SE (red) methods.
